# Supplementary material for: The Prevalence and Molecular Biology of Staphylococcus aureus Isolated from Healthy and Diseased Equine Eyes in Egypt
Source: MDPI journal article supplement (doi:10.3390/antibiotics11020221), 2022-02-10
Supplement: s1 [file s1]

Supplementary

# The Prevalence and Molecular Biology of *Staphylococcus aureus* Isolated from Healthy and Diseased Equine Eyes in Egypt

Amin Tahoun <sup>1,\*</sup>, Helmy K. Elnafarawy <sup>2</sup>, Hanem El-Sharkawy <sup>3</sup>, Amira M. Rizk <sup>4</sup>, Mohammed Alorabi <sup>5</sup>, Ahmed M. El-Shehawi <sup>5</sup>, Mohamed A. Youssef <sup>2</sup>, Hussam M. M. Ibrahim <sup>2</sup> and Sabry El-Khodery <sup>2</sup>

<sup>1</sup> Department of Animal Medicine, Faculty of Veterinary Medicine, Kafrelshkh University, Kafrelsheikh 33511, Egypt

<sup>2</sup> Department of Internal Medicine and Infectious Diseases, Faculty of Veterinary Medicine, Mansoura University, Mansoura 35516, Egypt; helmykamal@mans.edu.eg (H.K.E.); mohamed.youssef@mans.edu.eg (M.A.Y.); dr\_hussamhabosha@yahoo.com (H.M.M.I.); khodery@mans.edu.eg (S.E.)

<sup>3</sup> Department of Poultry and Rabbit Diseases, Faculty of Veterinary Medicine, Kafrelsheikh University, Kafrelsheikh 33511, Egypt; hanem\_amin@yahoo.com

<sup>4</sup> Department of Bacteriology, Mycology and Immunology, Faculty of Veterinary Medicine, Benha University, Benha 13518, Egypt; dr\_az80@yahoo.com

<sup>5</sup> Department of Biotechnology, College of Science, Taif University, P.O. Box 11099, Taif 21944, Saudi Arabia; maorabi@tu.edu.sa (M.A.); a.elshehawi@tu.edu.sa (A.M.E.-S.)

\* Correspondence: amin12\_veta@yahoo.com

|                                                       | 1    | 2    | 3    | 4    | 5    | 6    | 7    | 8    | 9    | 10   | 11   | 12   | 13   | 14   | 15   | 16   | 17   | 18   | 19   | 20   | 21   | 22   | 23   | 24 |
|-------------------------------------------------------|------|------|------|------|------|------|------|------|------|------|------|------|------|------|------|------|------|------|------|------|------|------|------|----|
| 1- MZ005310/Arabian_horse/Egypt/SA-AH/2019            |      |      |      |      |      |      |      |      |      |      |      |      |      |      |      |      |      |      |      |      |      |      |      |    |
| 2- MZ005311/Draft_horse/Egypt/SA-DH/2019              | 0.0% |      |      |      |      |      |      |      |      |      |      |      |      |      |      |      |      |      |      |      |      |      |      |    |
| 3- MZ005312/Donkey/Egypt/SA-D/2019                    | 0.0% | 0.0% |      |      |      |      |      |      |      |      |      |      |      |      |      |      |      |      |      |      |      |      |      |    |
| 4- MK690487.1/Homo_sapiens/Nigeria/SPH045L/2018       | 0.0% | 0.0% | 0.0% |      |      |      |      |      |      |      |      |      |      |      |      |      |      |      |      |      |      |      |      |    |
| 5- AP019751.1/Equus_caballus/Japan/JRA307/2018        | 0.0% | 0.0% | 0.0% | 0.0% |      |      |      |      |      |      |      |      |      |      |      |      |      |      |      |      |      |      |      |    |
| 6- CP034441.1/Bos_taurus/South_Korea/PMB_81-4/2015    | 0.0% | 0.0% | 0.0% | 0.0% | 0.0% |      |      |      |      |      |      |      |      |      |      |      |      |      |      |      |      |      |      |    |
| 7- MF175203.1/horse/Iran/IRN-20/2017                  | 0.0% | 0.0% | 0.0% | 0.0% | 0.0% | 0.0% |      |      |      |      |      |      |      |      |      |      |      |      |      |      |      |      |      |    |
| 8- CP017680.1/bakery_environment/USA/CFSAN007851/2011 | 0.0% | 0.0% | 0.0% | 0.0% | 0.0% | 0.0% | 0.0% |      |      |      |      |      |      |      |      |      |      |      |      |      |      |      |      |    |
| 9- CP017115.1/Homo_sapiens/South_Korea/FORC_045/2011  | 0.0% | 0.0% | 0.0% | 0.0% | 0.0% | 0.0% | 0.0% | 0.0% |      |      |      |      |      |      |      |      |      |      |      |      |      |      |      |    |
| 10- CP052008.1/Homo_sapiens/USA/ER06690.3/2016        | 0.0% | 0.0% | 0.0% | 0.0% | 0.0% | 0.0% | 0.0% | 0.0% | 0.0% |      |      |      |      |      |      |      |      |      |      |      |      |      |      |    |
| 11- KY110978.1/SGT_hospital/India/t127-88/2016        | 0.0% | 0.0% | 0.0% | 0.0% | 0.0% | 0.0% | 0.0% | 0.0% | 0.0% | 0.0% |      |      |      |      |      |      |      |      |      |      |      |      |      |    |
| 12- MH675823.1/cow/India/t7684-219e/2015              | 2.0% | 2.0% | 2.0% | 2.0% | 2.0% | 2.0% | 2.0% | 2.0% | 2.0% | 2.0% | 2.0% |      |      |      |      |      |      |      |      |      |      |      |      |    |
| 13- MK690483.1/Homo_sapiens/Nigeria/SPH004R/2018      | 2.5% | 2.5% | 2.5% | 2.5% | 2.5% | 2.5% | 2.5% | 2.5% | 2.5% | 2.5% | 2.5% | 0.5% |      |      |      |      |      |      |      |      |      |      |      |    |
| 14- CP010402.1/Homo_sapiens/Greece/GR2/2006           | 2.5% | 2.5% | 2.5% | 2.5% | 2.5% | 2.5% | 2.5% | 2.5% | 2.5% | 2.5% | 2.5% | 0.5% | 0.0% |      |      |      |      |      |      |      |      |      |      |    |
| 15- KC428640.1/Homo_sapiens/Egypt/Egy19A/2011         | 2.5% | 2.5% | 2.5% | 2.5% | 2.5% | 2.5% | 2.5% | 2.5% | 2.5% | 2.5% | 2.5% | 0.5% | 0.0% | 0.0% |      |      |      |      |      |      |      |      |      |    |
| 16- KC428635.1/Homo_sapiens/Egypt/Egy50A/2011         | 3.0% | 3.0% | 3.0% | 3.0% | 3.0% | 3.0% | 3.0% | 3.0% | 3.0% | 3.0% | 3.0% | 1.0% | 0.5% | 0.5% | 0.5% |      |      |      |      |      |      |      |      |    |
| 17- KC142144.1/Homo_sapiens/Denmark/60558/2012        | 3.5% | 3.5% | 3.5% | 3.5% | 3.5% | 3.5% | 3.5% | 3.5% | 3.5% | 3.5% | 3.5% | 4.6% | 5.1% | 5.1% | 5.1% | 5.6% |      |      |      |      |      |      |      |    |
| 18- MG431238.1/Homo_sapiens/Australia/H010/2016       | 5.1% | 5.1% | 5.1% | 5.1% | 5.1% | 5.1% | 5.1% | 5.1% | 5.1% | 5.1% | 5.1% | 7.3% | 7.8% | 7.8% | 7.8% | 8.4% | 3.5% |      |      |      |      |      |      |    |
| 19- CP013953.1/Homo_sapiens/Korea/NCCP14558/2013      | 5.1% | 5.1% | 5.1% | 5.1% | 5.1% | 5.1% | 5.1% | 5.1% | 5.1% | 5.1% | 5.1% | 7.3% | 7.9% | 7.9% | 7.9% | 8.5% | 4.7% | 5.1% |      |      |      |      |      |    |
| 20- LT992471.1/Homo_sapiens/Germany/17_LA_343/2017    | 5.1% | 5.1% | 5.1% | 5.1% | 5.1% | 5.1% | 5.1% | 5.1% | 5.1% | 5.1% | 5.1% | 7.3% | 7.8% | 7.8% | 7.8% | 8.4% | 3.5% | 0.0% | 5.1% |      |      |      |      |    |
| 21- LT699704.1/Homo_sapiens/Australia/NZ15MR0322/2015 | 5.1% | 5.1% | 5.1% | 5.1% | 5.1% | 5.1% | 5.1% | 5.1% | 5.1% | 5.1% | 5.1% | 7.3% | 7.8% | 7.8% | 7.8% | 8.4% | 3.5% | 0.0% | 5.1% | 0.0% |      |      |      |    |
| 22- CP063801.1/Homo_sapiens/India/KHS103/2019         | 5.1% | 5.1% | 5.1% | 5.1% | 5.1% | 5.1% | 5.1% | 5.1% | 5.1% | 5.1% | 5.1% | 7.3% | 7.9% | 7.9% | 7.9% | 8.5% | 4.7% | 5.1% | 0.0% | 5.1% | 5.1% |      |      |    |
| 23- LC577070.1/Homo_sapiens/Iraq/KAZ20/2019           | 2.5% | 2.5% | 2.5% | 2.5% | 2.5% | 2.5% | 2.5% | 2.5% | 2.5% | 2.5% | 2.5% | 0.5% | 0.0% | 0.0% | 0.0% | 0.5% | 5.1% | 7.8% | 7.9% | 7.8% | 7.8% | 7.9% |      |    |
| 24- CP049486.1/Homo_sapiens/USA/pt228/2016            | 5.1% | 5.1% | 5.1% | 5.1% | 5.1% | 5.1% | 5.1% | 5.1% | 5.1% | 5.1% | 5.1% | 7.3% | 7.9% | 7.9% | 7.9% | 8.5% | 4.7% | 5.1% | 0.0% | 5.1% | 5.1% | 0.0% | 7.9% |    |

**Figure S1.** Diversity percent between *S. aureus* strains identified in this study and other strains from GenBank. Diversity was calculated by MEGA X software.
